# Supplementary material for: Composition and Functionality of Lipid Emulsions in Parenteral Nutrition: Examining Evidence in Clinical Applications
Source: PubMed Central journal article supplement (PMC7201073; doi:10.3389/fphar.2020.00506), 2020-04-29
Supplement: Table_1.pdf [file Table_1.pdf]

## *Supplementary Material*

**TABLE S1** Clinical Outcomes of Randomized Controlled Trials categorized as per Lipid Emulsion Formulation Type

| No                                                 | Cited Studies                    | Patient Type                               | n<br>(IG/CG) | Control<br>Group | Duration<br>(days) | IIO* | NO* | CO* | Cellular<br>FAC<br>Changes* | Significant Outcomes*                                                                                                                | Jadad<br>Score† |
|----------------------------------------------------|----------------------------------|--------------------------------------------|--------------|------------------|--------------------|------|-----|-----|-----------------------------|--------------------------------------------------------------------------------------------------------------------------------------|-----------------|
| <b>RCTs with Soybean Oil Lipid Emulsion (SOLE)</b> |                                  |                                            |              |                  |                    |      |     |     |                             |                                                                                                                                      |                 |
| 1                                                  | Dionigi <i>et al</i> ,<br>1985   | Malnourished GI<br>cancer surgery          | 8/7          | Lipid<br>Free PN | 21                 | +, - | NR  | +   | NR                          | ↑ PMN cells for IG group.<br><br>No change in IgG, IgM, C3c, Factor B for IG.<br><br>↓ sepsis score for IG.                          | <b>2</b>        |
| 2                                                  | Gogos <i>et al</i> ,<br>1990     | Malnourished<br>critically ill             | 20/20        | Lipid<br>Free PN | 10                 | -    | NR  | NR  | NR                          | ↓ ratio of helper to suppressor T cells for IG                                                                                       | <b>1</b>        |
| 3                                                  | Sedman <i>et al</i> ,<br>1991    | Malnourished GI<br>cancer surgery          | 12/9         | Lipid<br>Free PN | 7                  | +, - | NR  | NR  | NR                          | ↓ LAK cell activity, ↑ IL-2 activity for IG.                                                                                         | <b>1</b>        |
| 4                                                  | Battisela <i>et al</i> ,<br>1997 | Polytrauma                                 | 30/27        | Lipid<br>Free PN | 10                 | NR   | NR  | -   | NR                          | ↑ infections, ↑ ICU stay, ↑ hospital stay,<br><br>↑ duration MV for IG.                                                              | <b>2</b>        |
| 5                                                  | Furukawa <i>et al</i> ,<br>2002  | Gastric, Colorectal<br>esophageal surgery  | 17/17        | Lipid<br>Free PN | 21                 | -    | -   | NR  | NR                          | ↑ IL-6 & ↑ CRP, ↓ lymphocyte proliferation in<br>severe stress IG.<br><br>↑ Glucagon, cumulative NB negative in severe<br>stress IG. | <b>2</b>        |
| 6                                                  | Monson <i>et al</i> ,<br>1986    | Malnourished,<br>septic, cancer<br>surgery | 12/11        | Lipid<br>Free PN | 14                 | +    | NR  | NR  | NR                          | ↑ IL2, ↑ T cells, & Helper T cells, ↑ ADCC<br>function for IG.                                                                       | <b>2</b>        |
| 7                                                  | Waitzberg <i>et al</i> ,<br>1997 | Malnourished GI<br>cancer surgery          | 10/10        | Lipid<br>Free PN | 2                  | -    | NR  | NR  | NR                          | ↓ bacteria killing mediated by neutrophils for IG.                                                                                   | <b>2</b>        |

TABLE S1 Continued

| No                                                               | Cited Studies                        | Patient Type                      | n<br>(IG/CG) | Control Group | Duration (days) | IIO* | NO*  | CO* | Cellular FAC Changes* | Significant Outcomes*                                                         | Jadad Score |
|------------------------------------------------------------------|--------------------------------------|-----------------------------------|--------------|---------------|-----------------|------|------|-----|-----------------------|-------------------------------------------------------------------------------|-------------|
| <b>RCTs with Physical Mixture MCT/LCT Lipid Emulsion</b>         |                                      |                                   |              |               |                 |      |      |     |                       |                                                                               |             |
| 8                                                                | Sedman <i>et al</i> , 1991           | Malnourished GI cancer surgery    | 12/12        | SOLE          | 7               | +    | NR   | NR  | NR                    | ↑ NK & ↑ LAK cell activity for IG.                                            | 1           |
| 9                                                                | Ball 1993                            | Ventilated ICU                    | 10/10        | SOLE          | 8               | NR   | +    | NR  | NR                    | ↓ negative NB for IG                                                          | 1           |
| 10                                                               | Jiang <i>et al</i> , 1993            | Abdominal surgery                 | 6/6          | SOLE          | 10              | NR   | +, - | NR  | NR                    | ↓ Body Weight, ↑ insulin, ↓ TG, ↑ β hydroxybutyrate for IG                    | 1           |
| 11                                                               | Smirmiotis <i>et al</i> , 1998       | Post operative, ICU, sepsis, ARDS | 11/10        | SOLE          | 1               | NR   | NR   | +   | NR                    | ↑ oxygen consumption, VO <sub>2</sub> for IG.                                 | 1           |
| 12                                                               | Garnacho-Montero <i>et al</i> , 2002 | ICU with sepsis                   | 26/26        | SOLE          | 10              | NR   | +    | NR  | NR                    | ↑ Retinol Binding Protein, ↑ insulin, improved NB for IG                      | 3           |
| 13                                                               | Grau <i>et al</i> , 2003             | Malnourished surgery & cancer     | 26/31        | SOLE          | 5               | NR   | NR   | +   | NR                    | ↓ intra-abdominal infection for IG.<br>↓ mortality in IG group without cancer | 2           |
| 14                                                               | Chen <i>et al</i> , 2005             | GI surgery                        | 15/15        | SOLE          | 7               | NR   | +    | NR  | NR                    | ↑ pre-albumin, ↑ insulin for IG                                               | 2           |
| 15                                                               | Iovinelli <i>et al</i> , 2007        | COPD on MV in ICU                 | 7/7          | SOLE          | 15              | +,-  | NR   | +   | NR                    | No change in immune markers for IG<br>↓ time of MV for IG                     | 2           |
| <b>RCTs with Structured Triglycerides Lipid Emulsion (STGLE)</b> |                                      |                                   |              |               |                 |      |      |     |                       |                                                                               |             |
| 16                                                               | Chambrier <i>et al</i> , 1999        | Post abdominal surgery            | 19/19        | MCT/LCT       | 5               | NR   | +    | NR  | NR                    | No ↑ TG, No ↑ ASAT, No ↑ ALAT, NB positive for IG                             | 3           |
| 17                                                               | Kruimel <i>et al</i> , 2001          | Postoperative aortic prosthesis   | 12/13        | MCT/LCT       | 5               | NR   | +    | NR  | NR                    | Improved cumulative NB, Less ↑ TG for IG                                      | 4           |

TABLE S1 Continued

| No                                               | Cited Studies                 | Patient Type                                      | n<br>(IG/CG) | Control Group | Duration (days) | IIO* | NO* | CO* | Cellular FAC Changes* | Significant Outcomes*                                                                                                                        | Jadad Score† |
|--------------------------------------------------|-------------------------------|---------------------------------------------------|--------------|---------------|-----------------|------|-----|-----|-----------------------|----------------------------------------------------------------------------------------------------------------------------------------------|--------------|
| 18                                               | Lindgren <i>et al</i> , 2001  | ICU                                               | 9/11         | SOLE          | 5               | NR   | +   | NR  | NR                    | Improved cumulative NB for IG                                                                                                                | 4            |
| 19                                               | Sandstrom <i>et al</i> , 1995 | Post abdominal surgery                            | 19/18        | SOLE          | 6               | NR   | +,- | NR  | NR                    | ↑ carbon dioxide production, ↑ whole-body fat oxidation, ↑ Free Fatty Acid, ↑ plasma glycerol, ↑ 3-hydroxybutyric acid, with STGLE in part 2 | 4            |
| <b>RCTs with Olive Oil Lipid Emulsion (OOLE)</b> |                               |                                                   |              |               |                 |      |     |     |                       |                                                                                                                                              |              |
| 20                                               | Vahedi <i>et al</i> , 2005    | Home parenteral nutrition with intestinal failure | 7/6          | SOLE          | 90              | NR   | NR  | NR  | +                     | ↑ $\gamma$ -LA, ↑ oleic acid, ↑ mead acid in plasma for IG                                                                                   | 4            |
| 21                                               | Onar <i>et al</i> , 2011      | Abdominal oncologic surgery                       | 10/10        | SOLE          | 7               | NR   | +,- | +,- | NR                    | ↑ ALP, ↑ GGT, ↑ total protein, ↑ albumin, ↓ total bilirubin for IG<br>No changes on catheter infections for IG                               | 3            |
| 22                                               | Demirer <i>et al</i> , 2016   | Elective GI surgery                               | 13/18        | MCT/LCT       | 4               | NR   | NR  | +   | NR                    | ↑ Weight, ↓ TBARS for IG                                                                                                                     | 1            |
| <b>RCTs with Fish Oil Lipid Emulsion (FOLE)</b>  |                               |                                                   |              |               |                 |      |     |     |                       |                                                                                                                                              |              |
| 23                                               | Morlion 1996                  | Abdominal surgery                                 | 10/10        | SOLE          | 5               | NR   | NR  | NR  | +                     | ↑ plasma phospholipid EPA, DHA and ALA for IG                                                                                                | 2            |
| 24                                               | Wachtler <i>et al</i> , 1997  | Major intestinal surgery                          | 20/20        | MCT/LCT       | 5               | +    | NR  | NR  | NR                    | ↑ LTB <sub>5</sub> , ↓ LTB <sub>4</sub> , ↓ LTB <sub>4</sub> /LTB <sub>5</sub> ratio, ↓ TNF- $\alpha$ for IG                                 | 3            |
| 25                                               | Roulet <i>et al</i> , 1997    | Elective total esophagectomy                      | 10/9         | SOLE          | 7               | NR   | NR  | NR  | +                     | ↑ EPA and EPA/AA in platelet phospholipids for IG                                                                                            | 2            |
| 26                                               | Linseisen <i>et al</i> , 2000 | Major abdominal cancer surgery                    | 17/16        | SOLE          | 5               | NR   | +   | NR  | +                     | ↑ $\alpha$ -tocopherol, ↓ $\gamma$ -tocopherol for IG<br>↑ plasma EPA, ↓ LA for IG                                                           | 3            |

TABLE S1 Continued

| No | Cited Studies                | Patient Type                      | n<br>(IG/CG) | Control Group | Duration (days) | IIO* | NO* | CO* | Cellular FAC Changes* | Significant Outcomes*                                                                                                                                                                     | Jadad Score† |
|----|------------------------------|-----------------------------------|--------------|---------------|-----------------|------|-----|-----|-----------------------|-------------------------------------------------------------------------------------------------------------------------------------------------------------------------------------------|--------------|
| 27 | Weiss <i>et al</i> , 2002    | Elective abdominal surgery        | 12/11        | SOLE          | 6               | +    | NR  | +   | NR                    | ↓ IL-6, ↑ HLA-DR for IG<br>↓ post-operative stay on medical ward for IG                                                                                                                   | 2            |
| 28 | Schauder <i>et al</i> , 2002 | Large bowel surgery               | 19/20        | SOLE          | 6               | +,-  | NR  | NR  | NR                    | ↑ IL-2, ↑ TNF, ↑ CD4/CD8 + for IG                                                                                                                                                         | 2            |
| 29 | Koller <i>et al</i> , 2003   | Elective abdominal surgery        | 14/16        | SOLE          | 5               | +    | NR  | NR  | NR                    | ↑ in LTB <sub>5</sub> , ↑ LTB <sub>5</sub> /LTB <sub>4</sub> ratio for IG                                                                                                                 | 2            |
| 30 | Grimm <i>et al</i> , 2006    | Major abdominal surgery           | 19/14        | SOLE          | 5               | +    | +   | +   | +                     | ↑ in LTB <sub>5</sub> , ↑ LTB <sub>5</sub> /LTB <sub>4</sub> ratio, ↑ α-tocopherol, ↓ length of hospital stay, ↑ total n-3 FA, ↑ plasma EPA & DHA, ↑ EPA/AA ratio, ↑ n-3:n-6 ratio for IG | 2            |
| 31 | Senkal <i>et al</i> , 2007   | Elective colorectal surgery       | 19/21        | MCT/LCT       | 5               | NR   | NR  | NR  | +                     | ↑ EPA & DHA, ↑ n-3:n-6 ratio for IG                                                                                                                                                       | 5            |
| 32 | Wichmann <i>et al</i> , 2007 | Major abdominal surgery           | 127/ 129     | SOLE          | 5               | +    | +   | NR  | NR                    | ↑ in LTB <sub>5</sub> , ↑ LTB <sub>5</sub> /LTB <sub>4</sub> ratio for IG<br>↑ α-tocopherol for IG                                                                                        | 3            |
| 33 | Liang <i>et al</i> , 2008    | Radical colorectal cancer surgery | 20/21        | SOLE          | 7               | +    | NR  | NR  | NR                    | ↓ IL-6, ↑ CD4+/CD8+ for IG                                                                                                                                                                | 5            |
| 34 | Berger <i>et al</i> , 2008   | Abdominal aortic aneurysm         | 12/12        | MCT/LCT       | 4               | NR   | NR  | NR  | +                     | ↑ in EPA & DHA for IG                                                                                                                                                                     | 3            |
| 35 | Piper <i>et al</i> , 2009    | Post abdominal surgery or cancer  | 22/22        | OOLE          | 5               | NR   | +   | NR  | NR                    | ↓ AST, ↓ ALT, ↓ α-GST, ↓ TG for IG                                                                                                                                                        | 4            |

TABLE S1 Continued

| No | Cited Studies                            | Patient Type                       | n<br>(IG/CG) | Control Group | Duration (days) | IIO* | NO* | CO* | Cellular FAC Changes* | Significant Outcomes*                                                                                                    | Jadad Score† |
|----|------------------------------------------|------------------------------------|--------------|---------------|-----------------|------|-----|-----|-----------------------|--------------------------------------------------------------------------------------------------------------------------|--------------|
| 36 | Badia-Tahull <i>et al</i> , 2010         | Elective GI surgery                | 13/14        | OOLE          | 5               | NR   | NR  | +   | NR                    | ↓ Infection rates for IG                                                                                                 | 5            |
| 37 | Jiang <i>et al</i> , 2010                | GI/colonic cancer                  | 100/ 103     | SOLE          | 7               | NR   | NR  | +   | NR                    | ↓ SIRS, ↓ hospital stay for IG                                                                                           | 5            |
| 38 | Ma <i>et al</i> , 2012                   | GI tumour surgery                  | 20/20        | MCT/LCT       | 5               | NR   | +   | NR  | NR                    | ↓ Low Density Lipoprotein for IG                                                                                         | 2            |
| 39 | Zhu <i>et al</i> , 2012                  | Colorectal cancer surgery          | 29/28        | SOLE          | 7               | +,-  | NR  | +   | NR                    | ↓ CD4+/CD8+, ↓ IL-6, ↓ TNF- $\alpha$ for IG<br>↓ duration of SIRS, ↓hospital stay                                        | 2            |
| 40 | Wang <i>et al</i> , 2012                 | GI surgery                         | 32/32        | MCT/LCT       | 5               | +,-  | +,- | NR  | NR                    | ↑ TNF- $\alpha$ , ↑ NF-K $\beta$ , ↑ LTB <sub>5</sub> /LTB <sub>4</sub> ratio for IG<br>↑ APTT, ↓ total bilirubin for IG | 3            |
| 41 | Klek <i>et al</i> , 2013                 | Intestinal failure                 | 34/39        | SOLE          | 28              | NR   | +   | NR  | +                     | ↓ AST, ↓ ALT ↓ total bilirubin, ↑ $\alpha$ -tocopherol for IG<br>↑ EPA & DHA in plasma & RBC, ↓ n-6:n-3 ratio for IG     | 5            |
| 42 | De Miranda Torrinhas <i>et al</i> , 2013 | GI cancer                          | 31/32        | MCT/LCT       | 3               | +    | NR  | NR  | NR                    | ↓ IL-6, ↓ IL-10 for IG                                                                                                   | 5            |
| 43 | Wu <i>et al</i> , 2014                   | GI surgery                         | 20/15        | MCT/LCT       | 5               | NR   | +   | NR  | NR                    | Less ↑ TG & ↓ Glucose for IG                                                                                             | 2            |
| 44 | Ma <i>et al</i> , 2015                   | Gastric, Colorectal cancer surgery | 45/41        | MCT/LCT       | 8               | NR   | +   | NR  | NR                    | Less ↑ TG, Less ↓HDL, Less ↓ Free Fatty Acid for IG                                                                      | 5            |
| 45 | Demirer <i>et al</i> , 2016              | Elective GI surgery                | 21/18        | MCT/LCT       | 4               | NR   | +   | NR  | NR                    | ↑ body weight, ↓ TBARS for IG                                                                                            | 1            |

TABLE S1 Continued

| No | Cited Studies                    | Patient Type       | n<br>(IG/CG) | Control Group | Duration (days) | IIO* | NO* | CO* | Cellular FAC Changes* | Significant Outcomes*                                                                                                                     | Jadad Score* |
|----|----------------------------------|--------------------|--------------|---------------|-----------------|------|-----|-----|-----------------------|-------------------------------------------------------------------------------------------------------------------------------------------|--------------|
| 46 | Mayer <i>et al</i> , 2003        | Sepsis             | 5/5          | SOLE          | 10              | +    | NR  | NR  | +                     | ↑ Neutrophil Inositol Phosphate, ↑ PAF, ↑ LTB <sub>5</sub> for IG<br>↑ respiratory burst for IG,<br>↑ EPA & DHA in plasma for IG          | 1            |
| 47 | Mayer <i>et al</i> , 2003        | Sepsis             | 10/9         | SOLE          | 5               | +    | NR  | NR  | +                     | ↓ TNF- $\alpha$ , ↓ IL-1B, ↓ IL-6 and ↓ IL-8 for IG<br>↑ EPA & DHA in plasma & leukocytes for IG                                          | 2            |
| 48 | Wang <i>et al</i> , 2008         | Acute pancreatitis | 20/20        | SOLE          | 5               | +    | NR  | +   | +                     | ↓ CRP, improvement in oxygenation index for IG<br>↓ CRRT days, ↑ plasma EPA for IG                                                        | 4            |
| 49 | Barbosa <i>et al</i> , 2010      | SIRS/Sepsis        | 13/10        | MCT/LCT       | 6               | +    | NR  | +   | +                     | ↓ IL-6, ↓ IL-10, ↓ TNF- $\alpha$ , ↓ IL-1 $\beta$ for IG<br>↓ hospital stay, ↑ PO <sub>2</sub> /FiO <sub>2</sub> , ↑ EPA in plasma for IG | 3            |
| 50 | Sungurtekin <i>et al</i> , 2011  | SIRS/Sepsis        | 10/10        | MCT/LCT       | 7               | +,-  | NR  | NR  | NR                    | ↑ IL-10, ↓ IL-6, ↓ TNF- $\alpha$ , ↓ IL-1 for IG with sepsis                                                                              | 1            |
| 51 | Sabater <i>et al</i> , 2011      | ARDS               | 8/8          | SOLE          | 12 hours        | +    | NR  | NR  | NR                    | ↓ LTB <sub>4</sub> for IG                                                                                                                 | 2            |
| 52 | Han <i>et al</i> , 2012          | Surgical ICU       | 18/12        | MCT/LCT       | 7               | +    | NR  | NR  | NR                    | ↓ IL-1, ↓ IL-8, ↓ IFN- $\gamma$ , ↓ IL-6, ↓ TNF- $\alpha$ for IG                                                                          | 5            |
| 53 | Gultekin <i>et al</i> , 2014     | Sepsis             | 16/16        | OOLE          | 5               | +    | +   | NR  | NR                    | ↓ LTB <sub>4</sub> , ↓ CRP, ↑ albumin for IG                                                                                              | 3            |
| 54 | Metry <i>et al</i> , 2014        | Post-surgery ICU   | 41/42        | SOLE          | 7               | +    | NR  | NR  | NR                    | ↓ IL-6 for IG                                                                                                                             | 5            |
| 55 | Grau-Carmona <i>et al</i> , 2015 | ICU                | 81/78        | MCT/LCT       | 5               | NR   | NR  | +   | NR                    | ↓ nosocomial infections, ↑ predicted time free of infection for IG                                                                        | 5            |

TABLE S1 Continued

| No | Cited Studies               | Patient Type              | n<br>(IG/CG) | Control Group | Duration (days) | IIO* | NO* | CO* | Cellular FAC Changes* | Significant Outcomes*                                                      | Jadad Score† |
|----|-----------------------------|---------------------------|--------------|---------------|-----------------|------|-----|-----|-----------------------|----------------------------------------------------------------------------|--------------|
| 56 | Chen <i>et al</i> , 2017    | Sepsis                    | 41/37        | SOLE          | 7               | NR   | NR  | +   | NR                    | ↓ 60 day mortality for IG                                                  | 3            |
| 57 | Bohnert <i>et al</i> , 2018 | Home Parenteral Nutrition | 15/18        | MCT/LCT       | 56              | -    | -   | -   | +                     | ↑ EPA, ↑ DHA, ↑ DPA in erythrocytes, platelets, serum phospholipids for IG | 5            |

AA, Arachidonic Acid; ADCC, Antibody-dependent cellular cytotoxicity; ALA, Alpha Linolenic Acid; ALAT, Alanine aminotransferase; ALP, Alkaline phosphatase; ALT, Alanine transaminase; APTT, Activated Partial Thromboplastin Time; ASAT/AST, Aspartate aminotransferase; CD4/CD8+, T4 helper cells/T8 suppressor cells; CG, Control Group; CO, Clinical Outcome; CRP, C-Reactive Protein; CRRT, Continuous Renal Replacement Therapy; DHA, docosahexaenoic acid; DPA, Docosapentaenoic acid; EPA, Eicosapentaenoic acid; FAC, Fatty Acid Composition; GGT, Gamma-Glutamyl Transferase; GI, Gastrointestinal; GST, Glutathione S-transferase; HLA-DR, Human Leukocyte Antigen-antigen D related; ICU, intensive care unit; IFN, Interferon; Ig, Immunoglobulin; IG, Intervention Group; IIO, Immuno-Inflammatory Outcome; IL, Interleukin; LA, Linoleic Acid; LAK, Lymphokine Activated Killer; LTB<sub>4</sub>, Leukotriene B<sub>4</sub>; LTB<sub>5</sub>, Leukotriene B<sub>5</sub>; MV, Mechanical Ventilation; NB, Nitrogen Balance; NF-κB, nuclear factor-κB; NK, Natural Killer; NO, Nutrition Outcome; PAF, Platelet Activating Factor; PMN, Polymorphonuclear; PN, Parenteral Nutrition; PO<sub>2</sub>/FiO<sub>2</sub>, partial pressure of oxygen/fraction of inspired oxygen; SIRS, Systemic Inflammatory Response Syndrome; TBARS, Thiobarbituric Acid Reactive Substances; TG, Triglyceride; TNF, Tumour Necrosis Factor.

**Footnote:**

\*“+”, benefit; “-”, risk; NR, Not Reported; “↓”, significantly reduced; “↑”, significantly increased.

†Jadad Score an instrument used to limit the risk of introducing bias and assess quality of RCTs. Scoring was given based on RCTs described as randomized, double-blinded and withdrawals or drop-outs were stated. Additional points were given if method to generate the sequence of randomization and double-blinding was described and it was appropriate. However points will be deducted if the method to generate the sequence of randomization and double-blinding was described but was inappropriate. Additionally if withdrawals were not mentioned, no points will be given. High quality RCTs are scored at 4- 5 and low quality at 1-2.
